# Supplementary material
Source: Springer Nature journal article supplement (https://www.springermedizin.de/resource/supplementary/12877_2011_753_MOESM1_ESM.pdf/9440252)

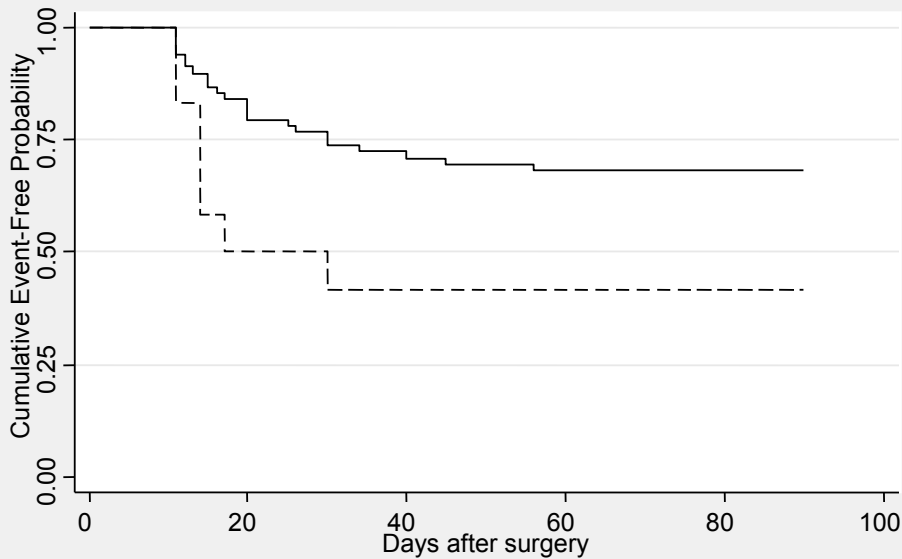

— Charlson scores ≤ 6      - - - - Charlson score > 6

Supplement: MOESM1 [file 9440252]
